# Supplementary material for: Stability and enhanced low-temperature NH3-SCR activity of supported vanadate catalysts in a microwave field
Source: Royal Society of Chemistry journal article supplement (doi:10.1039/d4cy00297k), 2024-01-01
Supplement: d4cy00297k1.pdf [file d4cy00297k1.pdf]

1

## Supporting Information

2

### Stability and Enhanced Low-Temperature NH<sub>3</sub>-SCR Activity of

3

### Supported Vanadate Catalysts in the Microwave Field

4

Liyun Song\*, Cui Liu, Shuangye Li, Chunyi Bian, Xing Fan, and Hong He

5

*Key Laboratory of Beijing on Regional Air Pollution Control, Beijing Key Laboratory for Green*

6

*Catalysis and Separation, Beijing University of Technology, Beijing 100124, China.*

7

### 8 Corresponding Author

9

\*Liyun Song E-mail address: [songly@bjut.edu.cn](mailto:songly@bjut.edu.cn)

10

11 **Mailing address:** Key Laboratory of Beijing on Regional Air Pollution Control,

12 Beijing Key Laboratory for Green Catalysis and Separation, Beijing University of

13 Technology, Beijing, 100124, China.

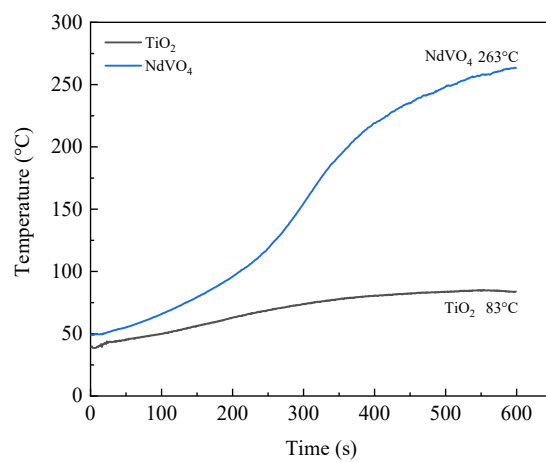

14

15 **Figure S1.** The capacity of microwave absorption of the NdVO<sub>4</sub> and TiO<sub>2</sub> material.

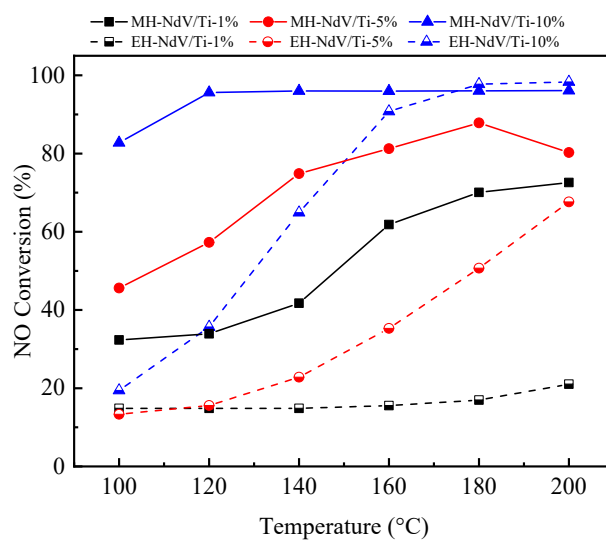

16

17 **Figure S2.** NO conversion (EH-electrical heating; MH-microwave heating) of the

18

NdV/Ti- $x$ % catalysts.

19 Reaction conditions:  $[\text{NH}_3] = [\text{NO}] = 700 \text{ ppm}$ ,  $[\text{O}_2] = 5\%$ , balance  $\text{N}_2$  and WHSV =

20

$30000 \text{ mL}/(\text{g}\cdot\text{h})$

21

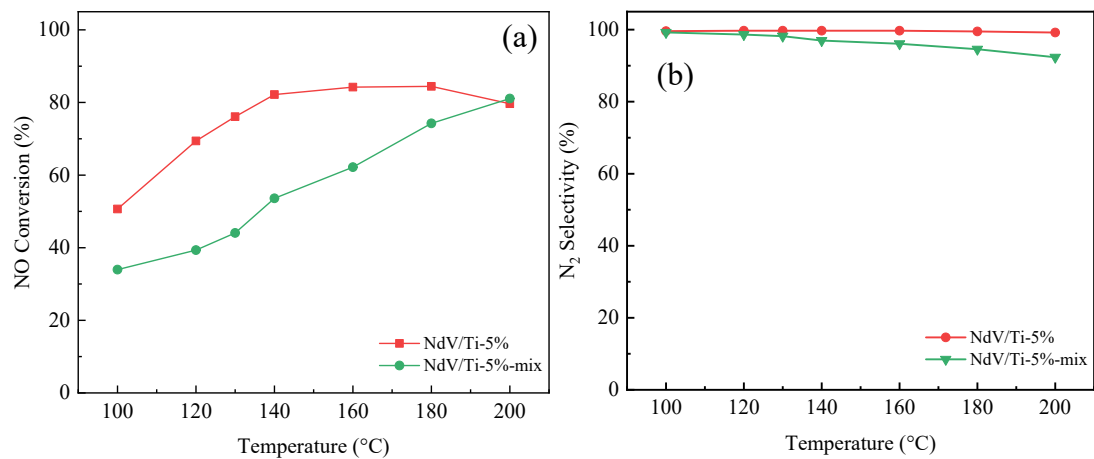

22

23 **Figure S3.** The catalytic performance of the NdV/Ti-5% and NdV/Ti-5%-mix

24 catalysts in a microwave field: (a) NO conversion, (b) N<sub>2</sub> Selectivity.

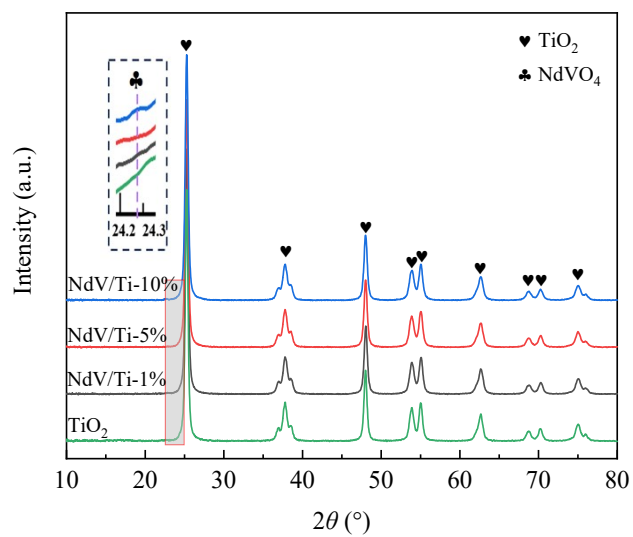

25

26 **Figure S4.** XRD patterns of the NdV/Ti-*x*% catalysts and TiO<sub>2</sub>

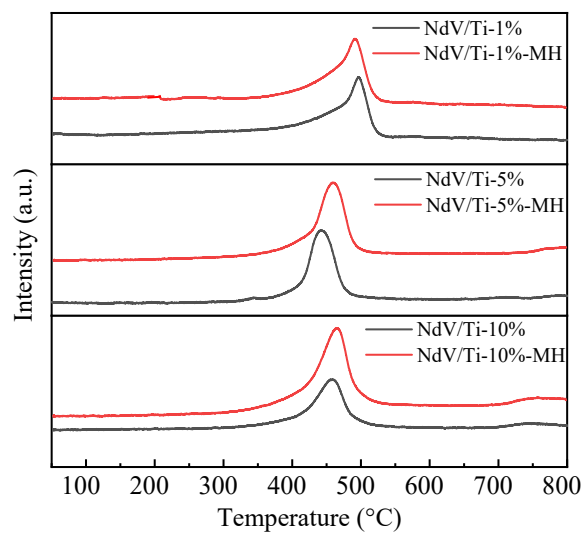

27

28 **Figure S5.** H<sub>2</sub>-TPR profiles of the catalysts before and after the reaction in the

29

microwave field.

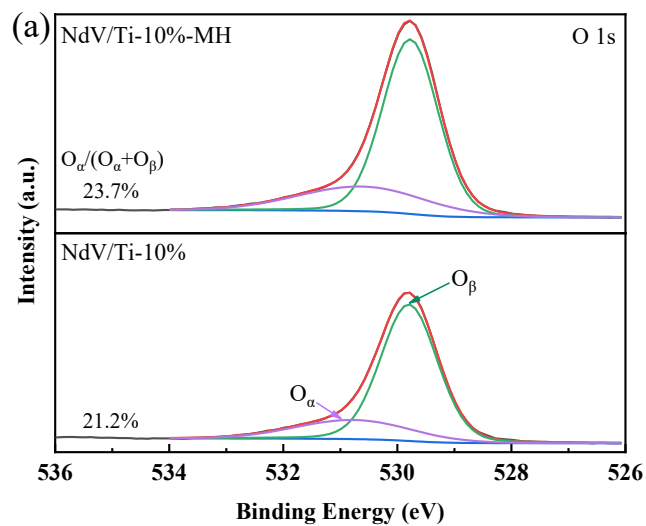

30

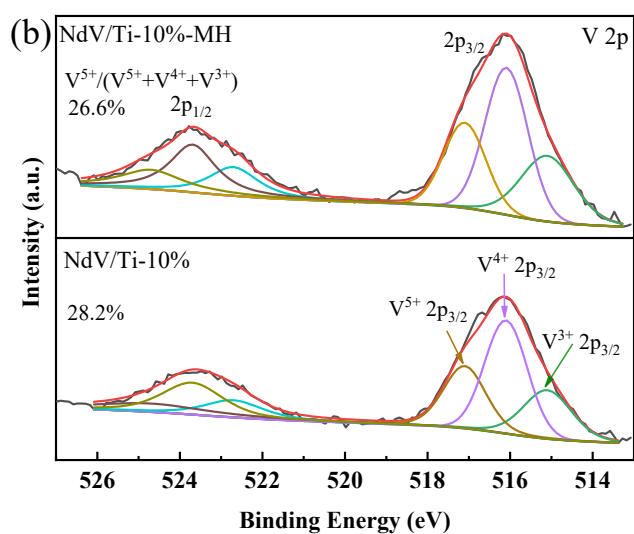

31

32

**Figure S6.** XPS spectra of NdV/Ti-10% catalyst before and after the reaction in

33

the microwave field: (a) O 1s, (b) V 2p.

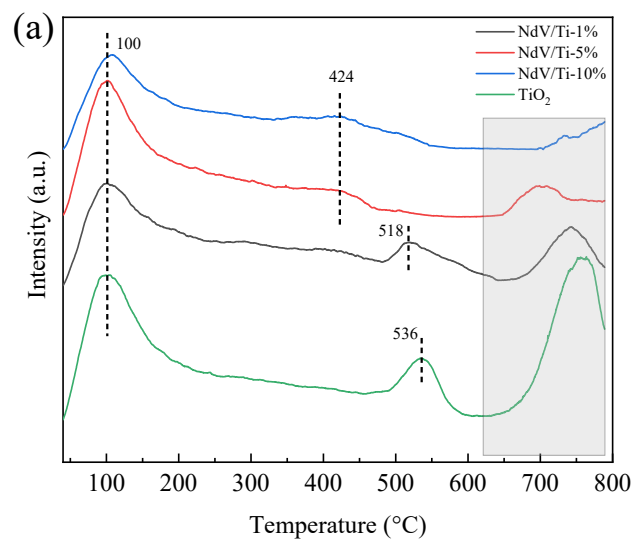

34

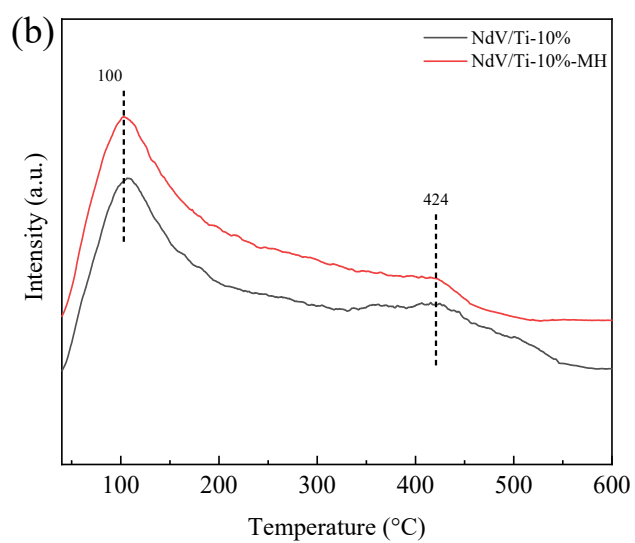

35

36 **Figure S7.**  $\text{NH}_3$ -TPD profiles of (a) NdV/Ti- $x\%$  catalysts and  $\text{TiO}_2$ ; (b) NdV/Ti-10%

37 catalyst before and after the reaction in the microwave field.



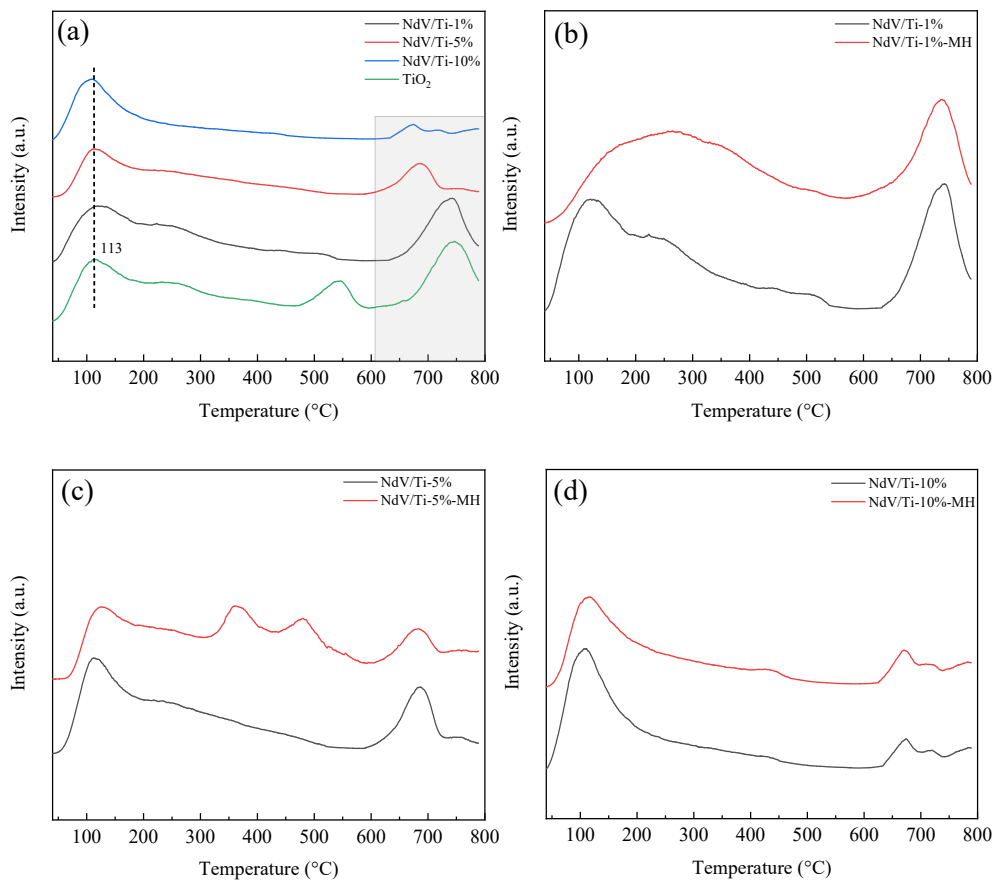

38

39

40 **Figure S8.** O<sub>2</sub>-TPD profiles of (a) NdV/Ti-*x*% and TiO<sub>2</sub>; catalyst before and after the  
 41 reaction in the microwave field: (b) NdV/Ti-1%, (c) NdV/Ti-5%, (d) NdV/Ti-10%.
